# Supplementary material for: Intervalence charge transfer in a “chain-like” ruthenium trinuclear assembly based on the bridging ligand 4,7-phenanthrolino-5,6:5′,6′-pyrazine (ppz)
Source: Royal Society of Chemistry journal article supplement (doi:10.1039/b512625h), 2005-11-17
Supplement: b512625h.pdf [file b512625h.pdf]

**Intervalence Charge Transfer in a “Chain-like”  
Ruthenium Trinuclear Assembly based on the  
Bridging Ligand 4,7-phenanthroline-5,6:5',6'-pyrazine (ppz)**

Deanna M. D'Alessandro and F. Richard Keene\*

**SUPPLEMENTARY INFORMATION**

**Table S1.**  $^1\text{H}$  Chemical shifts (ppm) for  $\Lambda$ - $[\text{Ru}(\text{bpy})(\text{HAT})_2]^{2+}$  and  $\Lambda^t$ - $[\text{Ru}(\text{bpy})(\text{ppz})_2]^{2+}$  ( $\text{CD}_3\text{CN}$ ,  $\text{PF}_6^-$  salts). The  $^1\text{H}$  NMR spectra of the  $\Delta$  and  $\Lambda$  enantiomers were identical in each case.

|                  |     | $[\text{Ru}(\text{bpy})(\text{HAT})_2]^{2+}$ | <i>trans</i> - $[\text{Ru}(\text{bpy})(\text{ppz})_2]^{2+}$ |
|------------------|-----|----------------------------------------------|-------------------------------------------------------------|
| bpy <sup>a</sup> | H3  | 8.60                                         | 8.58                                                        |
|                  | H4  | 8.16                                         | 8.14                                                        |
|                  | H5  | 7.39                                         | 7.34                                                        |
|                  | H6  | 7.83                                         | 7.83                                                        |
| HAT              | H2  | 8.39 (2H, $J = 3$ Hz, d)                     |                                                             |
|                  | H3  | 9.24 (2H, s)                                 |                                                             |
|                  | H6  | 9.39 (2H, s)                                 |                                                             |
|                  | H7  | 9.39 (2H, s)                                 |                                                             |
|                  | H10 | 9.02 (2H, s)                                 |                                                             |
|                  | H11 | 8.29 (2H, $J = 3$ Hz, d)                     |                                                             |
| ppz              | H2  |                                              | 8.86 (2H, $J = 3$ Hz, d)                                    |
|                  | H3  |                                              | 8.11 (2H, $J = 3$ Hz, d)                                    |
|                  | H6  |                                              | 8.22 (2H, $J = 5, 1$ Hz, dd)                                |
|                  | H7  |                                              | 7.97 (2H, $J = 10, 8$ Hz, dd)                               |
|                  | H8  |                                              | 9.32 (2H, $J = 8$ Hz, d)                                    |
|                  | H9  |                                              | 9.32 (2H, $J = 8$ Hz, d)                                    |
|                  | H10 |                                              | 8.11 (2H, $J = 10, 8$ Hz, dd)                               |
|                  | H11 |                                              | 9.26 (2H, $J = 3, 1.5$ Hz, dd)                              |

<sup>a</sup> H6 (2H,  $J = 5, 1.5$  Hz, dd); H5 (2H,  $J = 8, 5$  Hz, dd); H4 (2H,  $J = 8, 8$  Hz, dd); H3 (2H,  $J = 8, 1.5$  Hz, dd).

**Table S2.**  $^1\text{H}$  chemical shifts (ppm) for  $\Delta\Delta^t\Delta\text{-}[\{\text{Ru}(\text{bpy})_2\}_2\{\text{Ru}(\text{bpy})(\mu\text{-ppz})_2\}]^{6+}$  by comparison with the *meso*- and *rac*- $[\{\text{Ru}(\text{bpy})_2\}_2(\mu\text{-ppz})]^{4+}$  ( $\text{CD}_3\text{CN}$ ,  $\text{PF}_6^-$  salts).

|                                       |     | <i>meso</i> ( $\Delta\Delta/\Delta\Delta$ ) | <i>rac</i> ( $\Delta\Delta/\Delta\Delta$ ) | $\Delta\Delta^t\Delta$ |
|---------------------------------------|-----|---------------------------------------------|--------------------------------------------|------------------------|
| bpy ring a <sup>a</sup><br>(over bpy) | H3' | 8.58                                        | 8.53                                       | 8.59                   |
|                                       | H4' | 8.15                                        | 8.13                                       | 8.20                   |
|                                       | H5' | 7.50                                        | 7.51                                       | 7.52                   |
|                                       | H6' | 7.73                                        | 7.76                                       | 7.77                   |
| bpy ring b <sup>a</sup><br>(over ppz) | H3  | 8.52                                        | 8.51                                       | 8.50                   |
|                                       | H4  | 8.09                                        | 8.07                                       | 8.10                   |
|                                       | H5  | 7.39                                        | 7.02                                       | 7.17                   |
|                                       | H6  | 7.85                                        | 7.61                                       | 7.42                   |
| bpy ring c <sup>a</sup><br>(over bpy) | H3' | 8.43                                        | 8.55                                       | 8.53                   |
|                                       | H4' | 8.06                                        | 8.15                                       | 8.20                   |
|                                       | H5' | 7.42                                        | 7.38                                       | 7.36                   |
|                                       | H6' | 7.75                                        | 7.66                                       | 7.65                   |
| bpy ring d <sup>a</sup><br>(over ppz) | H3  | 8.39                                        | 8.48                                       | 8.53                   |
|                                       | H4  | 7.99                                        | 8.00                                       | 8.07                   |
|                                       | H5  | 7.25                                        | 7.36                                       | 7.20                   |
|                                       | H6  | 7.54                                        | 7.42                                       | 7.65                   |
| bpy ring e <sup>a</sup><br>(over ppz) | H3  |                                             |                                            | 8.53                   |
|                                       | H4  |                                             |                                            | 8.02                   |
|                                       | H5  |                                             |                                            | 7.36                   |
|                                       | H6  |                                             |                                            | 7.47                   |
| ppz <sup>b</sup>                      | H2  | 7.93 (H2/3)                                 | 7.96 (H2/3)                                | 7.98                   |
|                                       | H3  |                                             |                                            | 8.08                   |
|                                       | H6  | 8.23 (H6/11)                                | 8.23 (H6/11)                               | 8.25                   |
|                                       | H7  | 8.01 (H7/10)                                | 8.01 (H7/10)                               | 8.10                   |
|                                       | H8  | 9.32 (H8/9)                                 | 9.31 (H8/9)                                | 9.36                   |
|                                       | H9  |                                             |                                            | 9.33                   |
|                                       | H10 |                                             |                                            | 8.03                   |
| H11                                   |     |                                             | 8.09                                       |                        |

<sup>a</sup> H6 (dd;  $J = 5, 1.5$  Hz); H5 (dd;  $J = 8, 5$  Hz); H4 (dd;  $J = 8, 8$  Hz); H3 (dd;  $J = 8, 1.5$  Hz).

<sup>b</sup> H2/3 (s); H 6/11 (dd,  $J = 5, 1.5$  Hz); H7/10 (dd,  $J = 10, 8$  Hz); H8/9 (dd,  $J = 8, 1.5$  Hz).

**Table S3.** Ligand-based reduction potentials<sup>a</sup> data (in mV), and K<sub>c</sub> values<sup>b</sup> for the di- and trinuclear complexes in 0.1 M [(*n*-C<sub>4</sub>H<sub>9</sub>)<sub>4</sub>N]PF<sub>6</sub>/CH<sub>3</sub>CN at +25°C. The potentials for [Ru(bpy)<sub>3</sub>]<sup>2+</sup> are included for comparison.

| Complex                                                                                                 | E <sub>red1</sub> | E <sub>red2</sub> | E <sub>red3</sub>  | E <sub>red4</sub>  |
|---------------------------------------------------------------------------------------------------------|-------------------|-------------------|--------------------|--------------------|
| [Ru(bpy) <sub>3</sub> ] <sup>2+</sup>                                                                   | -1717             | -1912             | -2160              | -2700              |
| <i>trans</i> -[Ru(bpy)(ppz) <sub>2</sub> ] <sup>2+</sup> <sup>c</sup>                                   | -1000             | -1246             | -1700              | -1968 <sup>b</sup> |
| <i>meso</i> -[ {Ru(bpy) <sub>2</sub> } <sub>2</sub> (μ-ppz)] <sup>4+</sup>                              | -956              | -1704             | -1890              | -1956              |
| <i>rac</i> -[ {Ru(bpy) <sub>2</sub> } <sub>2</sub> (μ-ppz)] <sup>4+</sup>                               | -944              | -1696             | -1878              | -1975              |
| ΔΔ <sup>t</sup> Δ- [ {Ru(bpy) <sub>2</sub> } <sub>2</sub> {Ru(bpy)(μ-ppz) <sub>2</sub> }] <sup>6+</sup> | -868              | -1036             | -1800 <sup>b</sup> | -2072 <sup>b</sup> |

<sup>a</sup> All potentials (± 3 mV) in 0.1 M [(*n*-C<sub>4</sub>H<sub>9</sub>)<sub>4</sub>N]PF<sub>6</sub>/CH<sub>3</sub>CN at +25°C vs. Fc<sup>+</sup>/Fc<sup>0</sup>.

<sup>b</sup> Two-electron reduction process.

<sup>c</sup> The redox properties of the Δ and Λ enantiomers were identical.

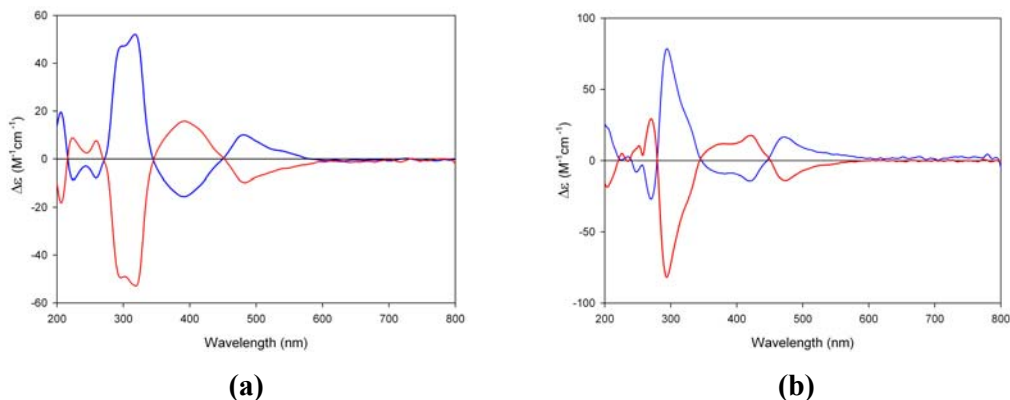

**Figure S1.** CD spectra (CH<sub>3</sub>CN) of **(a)** Δ- and Λ-[Ru(bpy)(HAT)<sub>2</sub>]<sup>2+</sup>, Band 1 (Δ): ( — ) and Band 2 (Λ): ( — ); **(b)** Δ<sup>t</sup>- and Λ<sup>t</sup>-[Ru(bpy)(ppz)<sub>2</sub>]<sup>2+</sup>, Band 1 (Δ) ( — ) and Band 4 (Λ): ( — ).

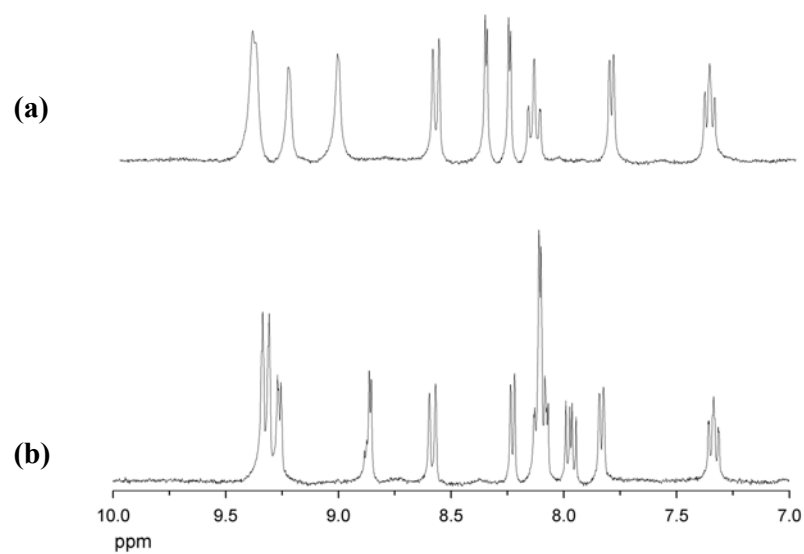

**Figure S2.**  $^1\text{H}$  NMR spectra of (a)  $\Lambda$ - $[\text{Ru}(\text{bpy})(\text{HAT})_2]^{2+}$  and (b)  $\Lambda^t$ - $[\text{Ru}(\text{bpy})(\text{ppz})_2]^{2+}$  ( $\text{CD}_3\text{CN}$ ,  $\text{PF}_6^-$  salts).

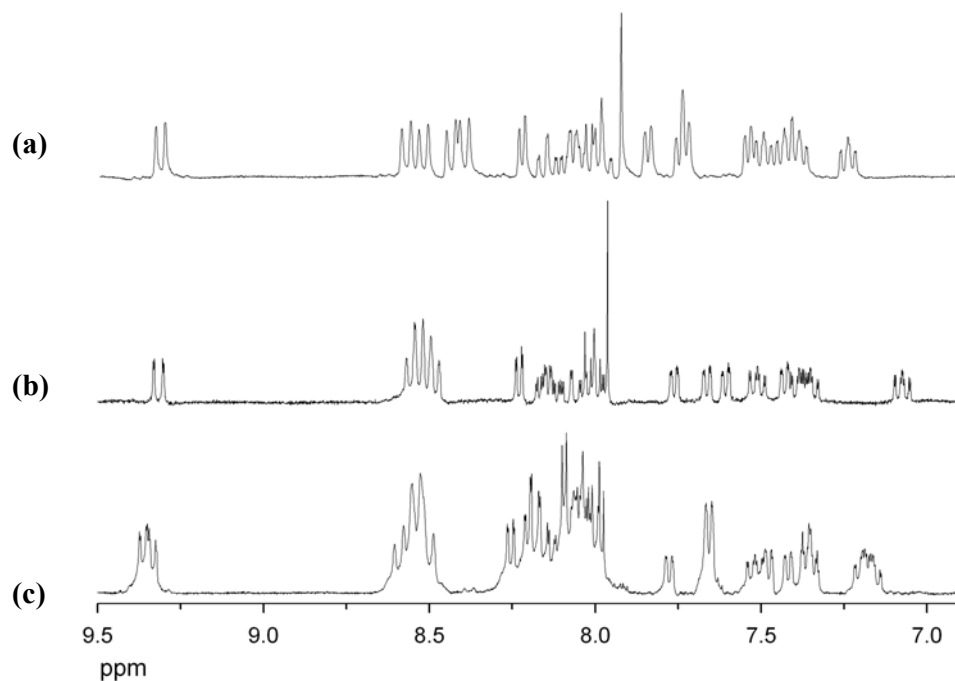

**Figure S3.**  $^1\text{H}$  NMR spectra ( $\text{CH}_3\text{CN}$ ) for **(a)** *meso*- and **(b)** *rac*- $[\{\text{Ru}(\text{bpy})_2\}_2(\mu\text{-ppz})]^{4+}$ , and **(c)**  $\Delta\Delta^1\Delta$ - $[\{\text{Ru}(\text{bpy})_2\}_2\{\text{Ru}(\text{bpy})(\mu\text{-ppz})_2\}]^{6+}$  ( $\text{CD}_3\text{CN}$ ,  $\text{PF}_6^-$  salts).

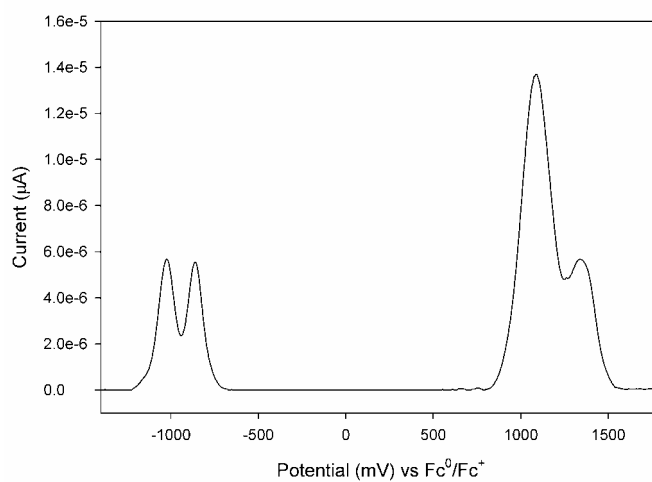

**Figure S4.** Differential Pulse Voltammogram of  $\Delta\Delta^t\Delta^-$  [ $\{\text{Ru}(\text{bpy})_2\}_2\{\text{Ru}(\text{bpy})(\mu\text{-ppz})_2\}$ ] $^{6+}$  in 0.1 M  $[(n\text{-C}_4\text{H}_9)_4\text{N}]\text{PF}_6/\text{CH}_3\text{CN}$  at +25°C.

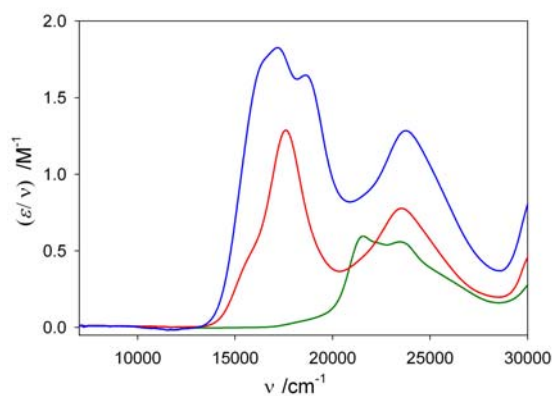

**Figure S5.** UV/Vis/NIR spectra of  $[\text{Ru}(\text{bpy})(\text{ppz})_2]^{2+}$  ( ——— ), *meso*- $[\{\text{Ru}(\text{bpy})_2\}_2(\mu\text{-ppz})]^{4+}$  ( ——— ) and  $\Delta\Delta^t\Delta^-$ - $[\{\text{Ru}(\text{bpy})_2\}_2\{\text{Ru}(\text{bpy})(\mu\text{-ppz})_2\}]^{6+}$  ( ——— ) in  $\text{CH}_3\text{CN}$  at  $+25^\circ\text{C}$ .

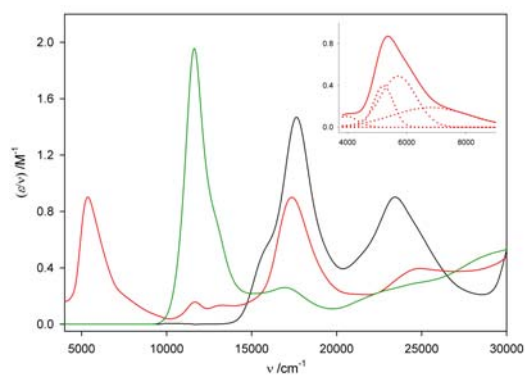

**Figure S6.** UV/Vis/NIR spectra of *meso*- $[\{\text{Ru}(\text{bpy})_2\}_2(\mu\text{-ppz})]^{n+}$   $\{n = 4$  ( ——— ),  $5$  ( ——— ),  $6$  ( ——— ) $\}$  at  $-35^\circ\text{C}$ . The inset shows the best fit of the bands obtained by Gaussian deconvolution of the IVCT band.
